# Supplementary material for: Selective photocatalytic conversion of methane into carbon monoxide over zinc-heteropolyacid-titania nanocomposites
Source: PubMed Central journal article supplement (PMC6370819; doi:10.1038/s41467-019-08525-2), 2019-02-11
Supplement: 41467_2019_8525_MOESM1_ESM.pdf [file 41467_2019_8525_MOESM1_ESM.pdf]

## Supplementary Information

### **Selective photocatalytic conversion of methane into carbon monoxide over zinc-heteropolyacid-titania nanocomposites**

*Xiang Yu et al*

**Supplementary Table 1.** Catalytic performances for photocatalytic CH<sub>4</sub> conversion measured under irradiation at different spectral ranges.

| Spectral range of irradiation (nm) | Formation rate ( $\mu\text{mol g}^{-1} \text{h}^{-1}$ ) |                 | Irradiance (mW $\text{cm}^{-2}$ ) | Formation rate to power ratio ( $\mu\text{mol g}^{-1} \text{h}^{-1} \text{mW}^{-1} \text{cm}^2$ ) |
|------------------------------------|---------------------------------------------------------|-----------------|-----------------------------------|---------------------------------------------------------------------------------------------------|
|                                    | CO                                                      | CO <sub>2</sub> |                                   |                                                                                                   |
| >382                               | 11                                                      | 5.9             | 94                                | 0.12                                                                                              |
| 280-400                            | 208                                                     | 48              | 38                                | 5.5                                                                                               |

Reaction conditions: catalyst, 0.1 g; Gas phase pressure, CH<sub>4</sub> 0.3 MPa, Air 0.1 MPa; irradiation time, 6h; light source, Hamamatsu LC8-06 Hg-Xe stabilized irradiation lamps with a spectral irradiance in the range 240-600; Cut-off filter :Vis-IR  $\lambda > 382$  nm; UV light,  $\lambda = 280-400$  nm.

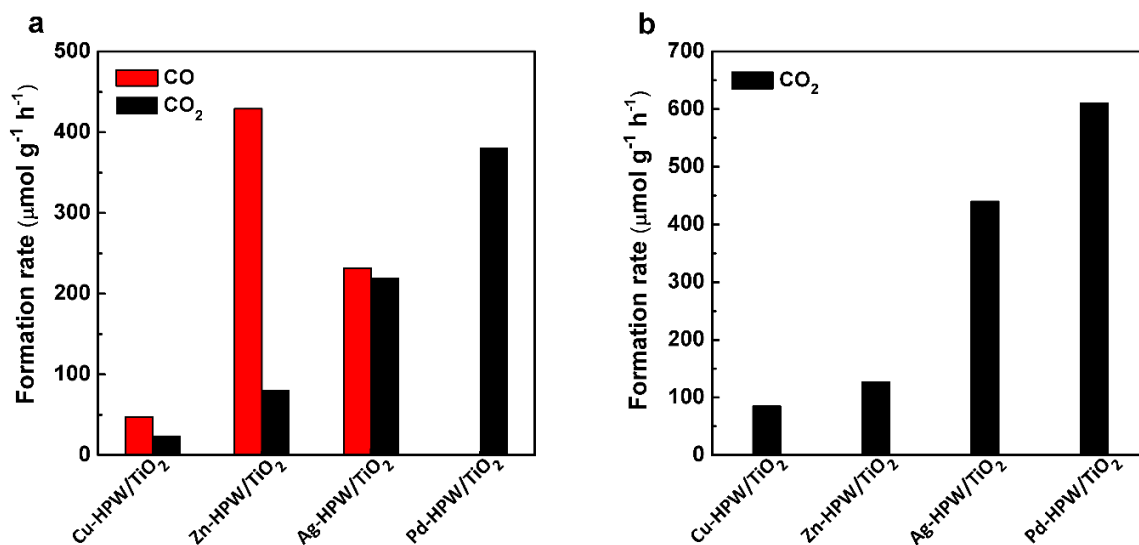

**Supplementary Figure 1.** (a) CO and CO<sub>2</sub> production rates in the CH<sub>4</sub> oxidation and (b) CO<sub>2</sub> production rate in the CO oxidation over different catalysts. Reaction conditions: catalyst, 0.1 g; Gas phase pressure, (a) CH<sub>4</sub> 0.3 MPa, Air 0.1 MPa; (b) CO 0.3 MPa, Air 0.1 MPa; irradiation time, 6h.

We have conducted a comparative study of both CH<sub>4</sub> and CO photo-oxidation over the HPW-TiO<sub>2</sub> composites containing Cu, Zn, Ag and Pd. The relevant tests were carried out respectively in methane and air (**Supplementary Figure 1a**) and in CO and air (**Supplementary Figure 1b**). Interestingly, the rate of CO<sub>2</sub> production increases in the same sequence (Cu-HPW/TiO<sub>2</sub> < Zn-HPW/TiO<sub>2</sub> < Ag-HPW/TiO<sub>2</sub> < Pd-HPW/TiO<sub>2</sub>) in both methane and carbon monoxide oxidation reactions.

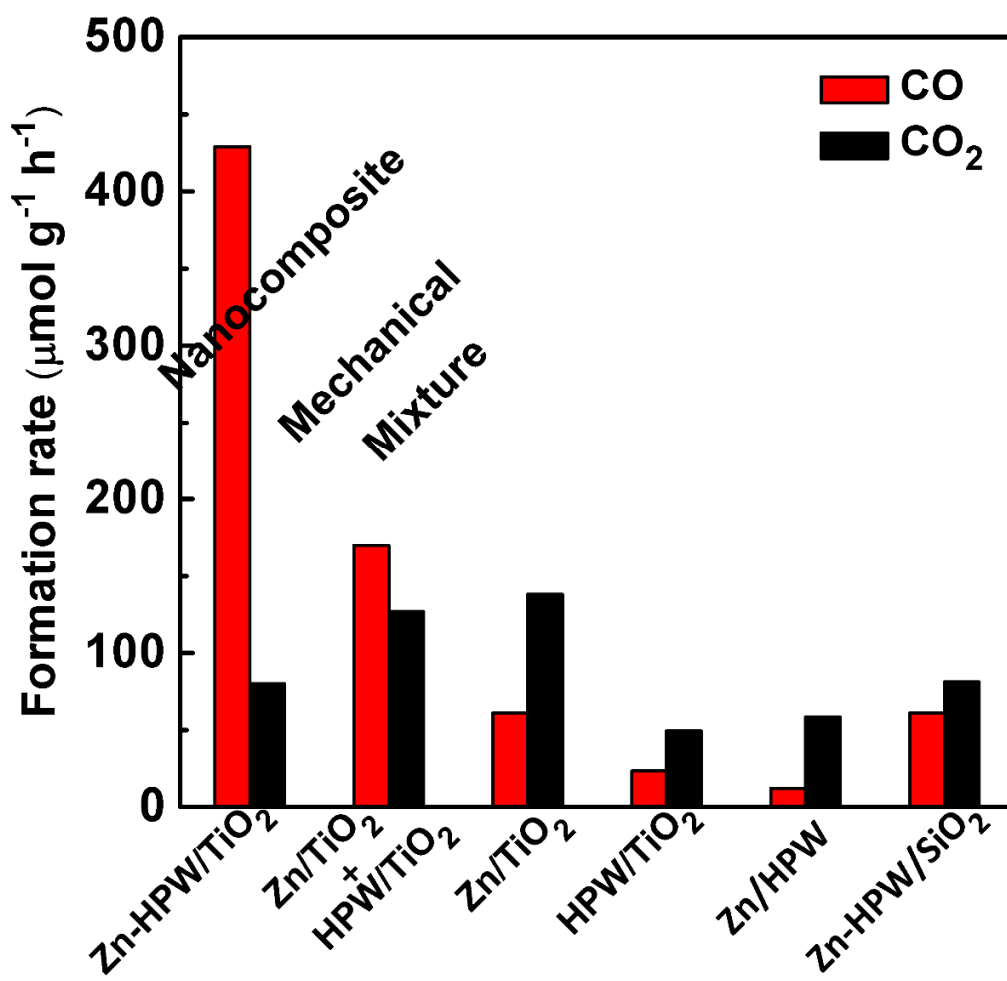

**Supplementary Figure 2.** Carbon monoxide and carbon dioxide formation rate over nanocomposites and mechanical mixtures. Reaction conditions: catalyst, 0.1 g; Gas phase pressure, CH<sub>4</sub> 0.3 MPa, Air 0.1 MPa; irradiation time, 6h.

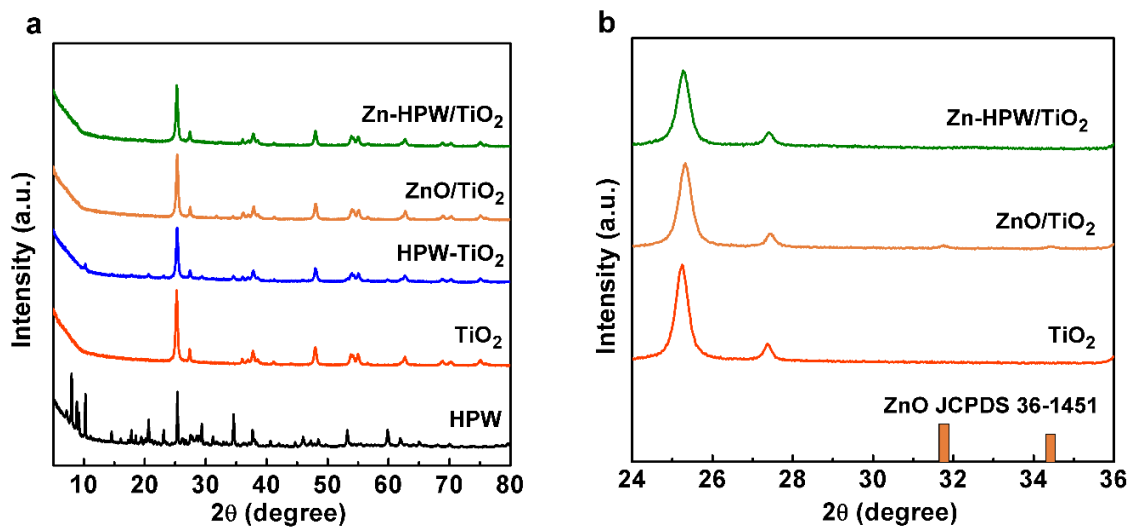

**Supplementary Figure 3.** XRD patterns of different nanocomposites catalysts. (a) 2 θ range: 5-80° and (b) 2 θ range 24-36°.

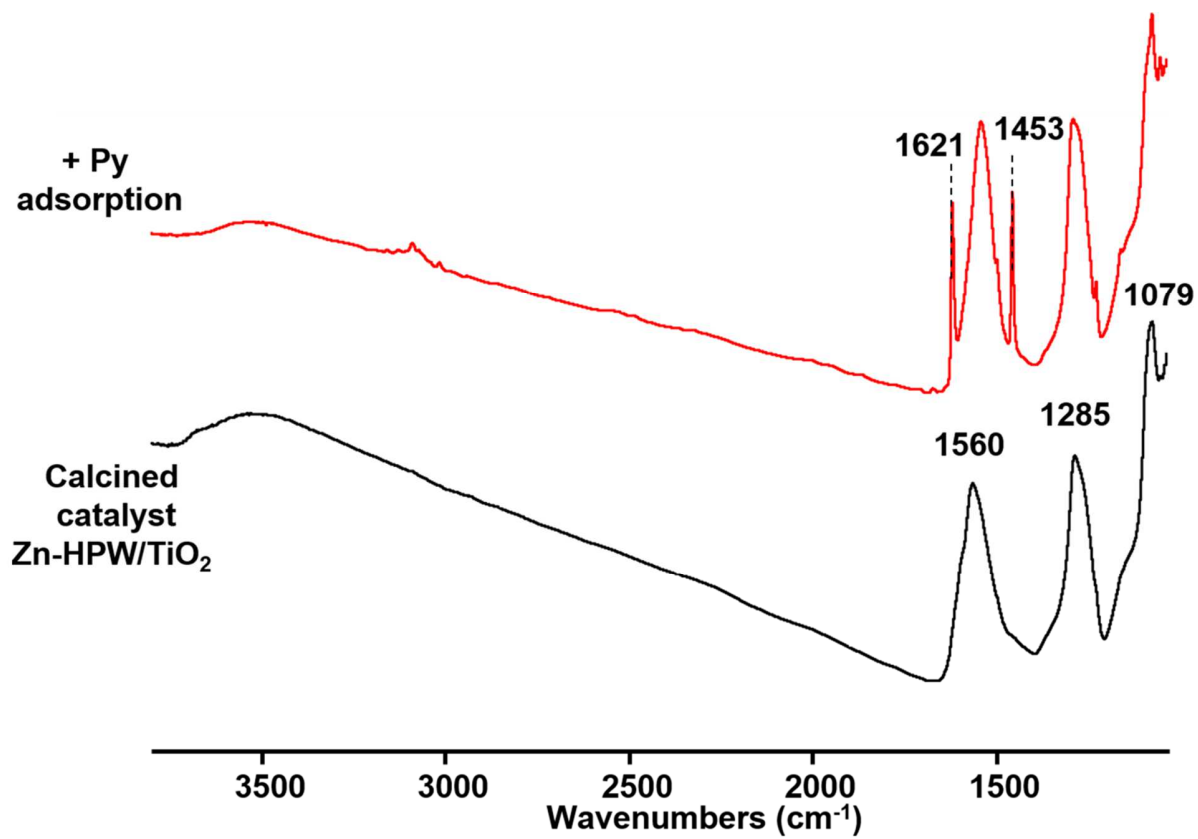

**Supplementary Figure 4.** FTIR spectra of the Zn-HPW/TiO<sub>2</sub> catalyst before and after adsorption of pyridine and sample evacuation at 200°C.

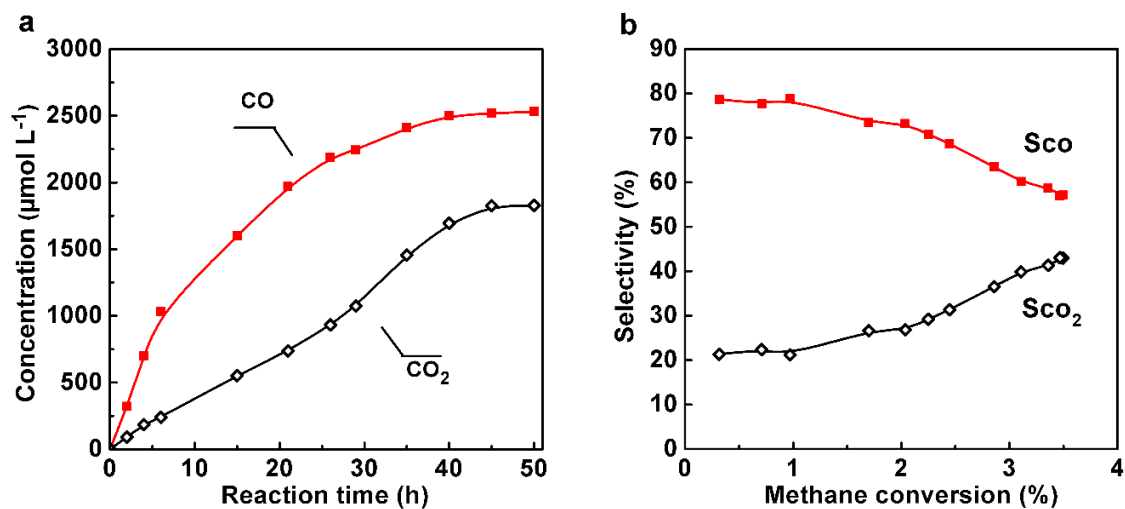

**Supplementary Figure 5.** (a). CO and CO<sub>2</sub> concentrations in the reactor as function of time on stream on Zn-HPW-TiO<sub>2</sub> catalyst; (b) CO and CO<sub>2</sub> selectivities as functions of methane conversion. Reaction conditions: catalyst, 0.1 g; Gas phase pressure, CH<sub>4</sub> 0.3 MPa, Air 0.1 MPa; irradiation time, 50h.

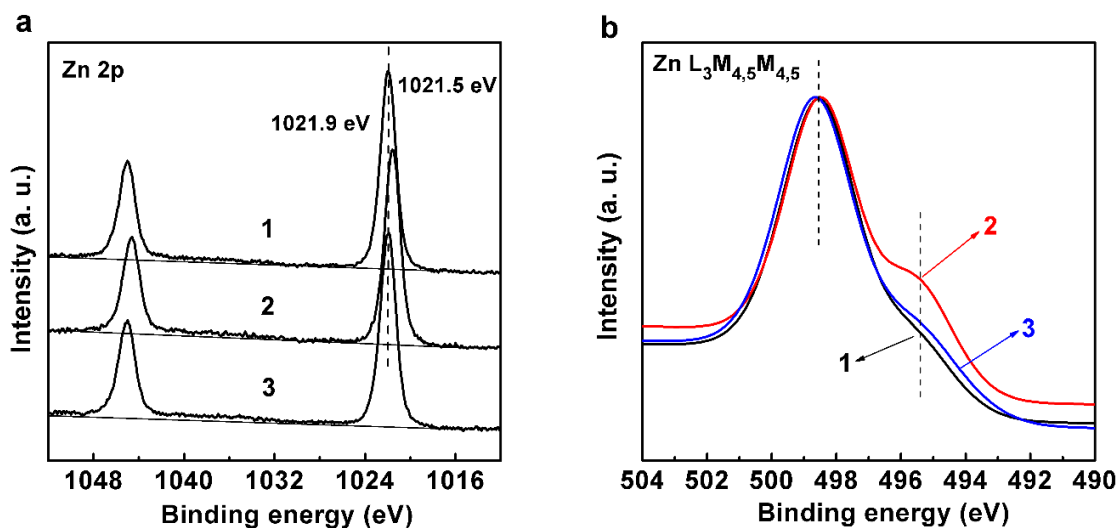

**Supplementary Figure 6.** XPS (a) and Zn L<sub>3</sub>M<sub>4,5</sub>M<sub>4,5</sub> Auger spectra, (b) of Zn-HPW/TiO<sub>2</sub> catalysts in the regions of Zn 2p. (1). fresh catalyst, (2). treatment in 0.3 MPa CH<sub>4</sub> under 400 W Xe lamp for 12h, (3). regeneration in 0.1 MPa air under 400 W Xe lamp for 12h.

The positions of all Auger peaks were aligned by the C 1s peak, and a Shirley background was subtracted. The Zn Auger peak from Zn-HPW/TiO<sub>2</sub> catalysts in **Supplementary Figure 6b** is normalized to the peak height of the ZnO Auger feature.



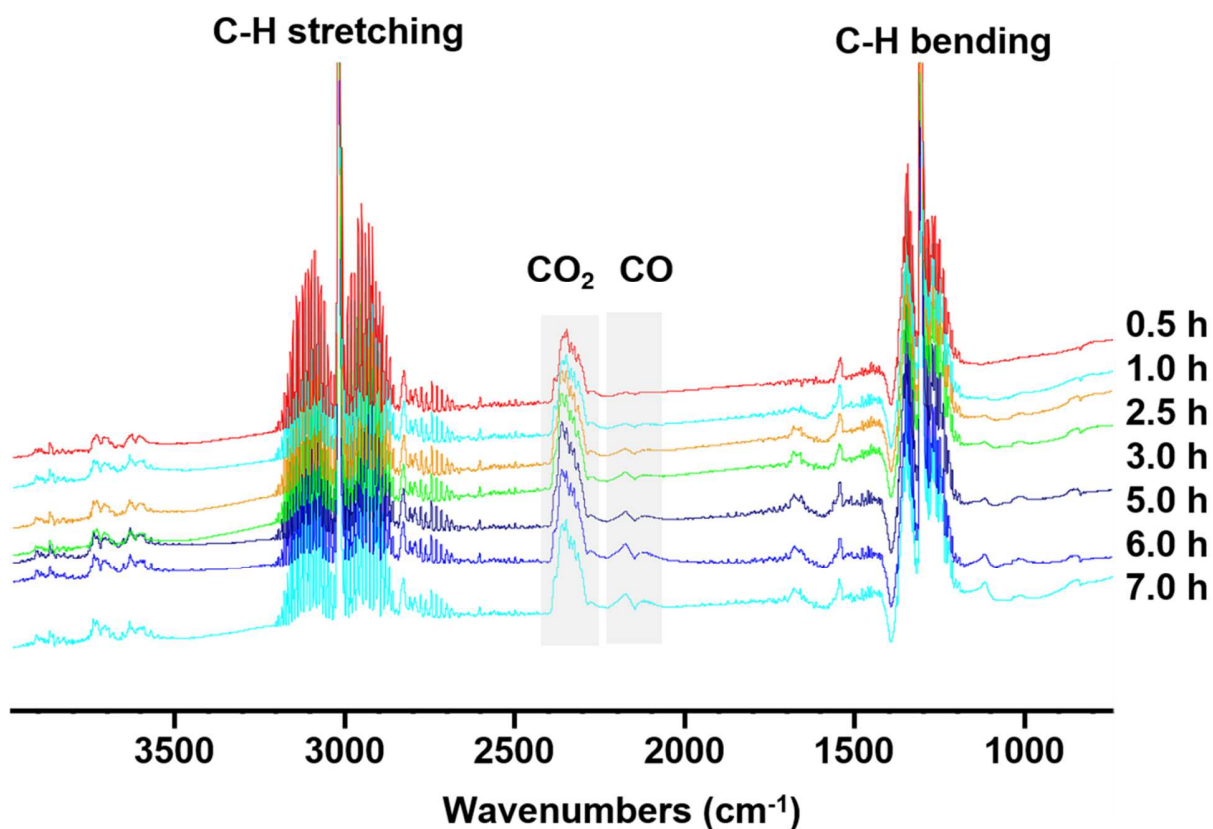

**Supplementary Figure 7.** FTIR spectra of gaseous phase during methane photocatalytic oxidation over the Zn-HPW/TiO<sub>2</sub> catalyst as a function of reaction time.

IR analysis of the gaseous phase (**Supplementary Figure 7**) clearly shows the presence of methane in the IR cell at the initial periods of the reaction (CH rotation- stretching and rotation- bending bands at around 3020 cm<sup>-1</sup> and 1300 cm<sup>-1</sup> respectively). At longer reaction time, gaseous carbon monoxide was identified by rotation- stretching bands at 2150 cm<sup>-1</sup>. In agreement with the results of photocatalytic tests, the intensity of the carbon monoxide IR band at 2150 cm<sup>-1</sup> increases with the reaction time.

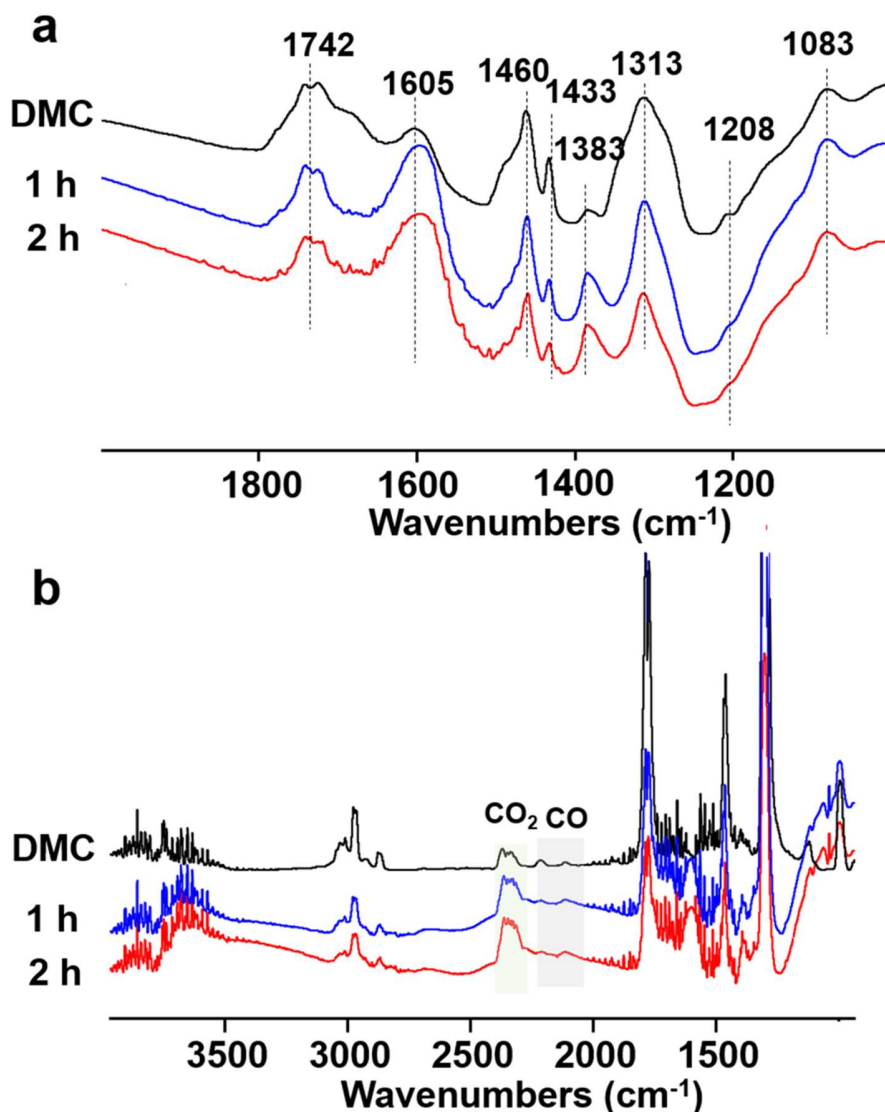

**Supplementary Figure 8.** IR spectra of adsorbed DMC during exposure to light (a) and gas phase analysis (b).

(The bands at 1742, 1460, and 1313 cm<sup>-1</sup> are attributable to C=O stretching,  $\nu_{as}(\text{CO}_3)$  and  $\nu_s(\text{CO}_3)$  of O–C–O stretching modes of carbonate species associated with the Zn cations.

This assignment is supported by the work of DMC adsorption over cationic zeolites [*T. Beutel, J. Chem. Soc., Faraday Trans., 1998, 94, 985-993; Y. Zhang, A. T. Bell, Journal of Catalysis 255 (2008) 153–161*]. The bands at 1208 and 1083 cm<sup>-1</sup> might be assigned to  $\nu(\text{C-O})$  stretching bands in carbonate and methoxy groups, respectively.)

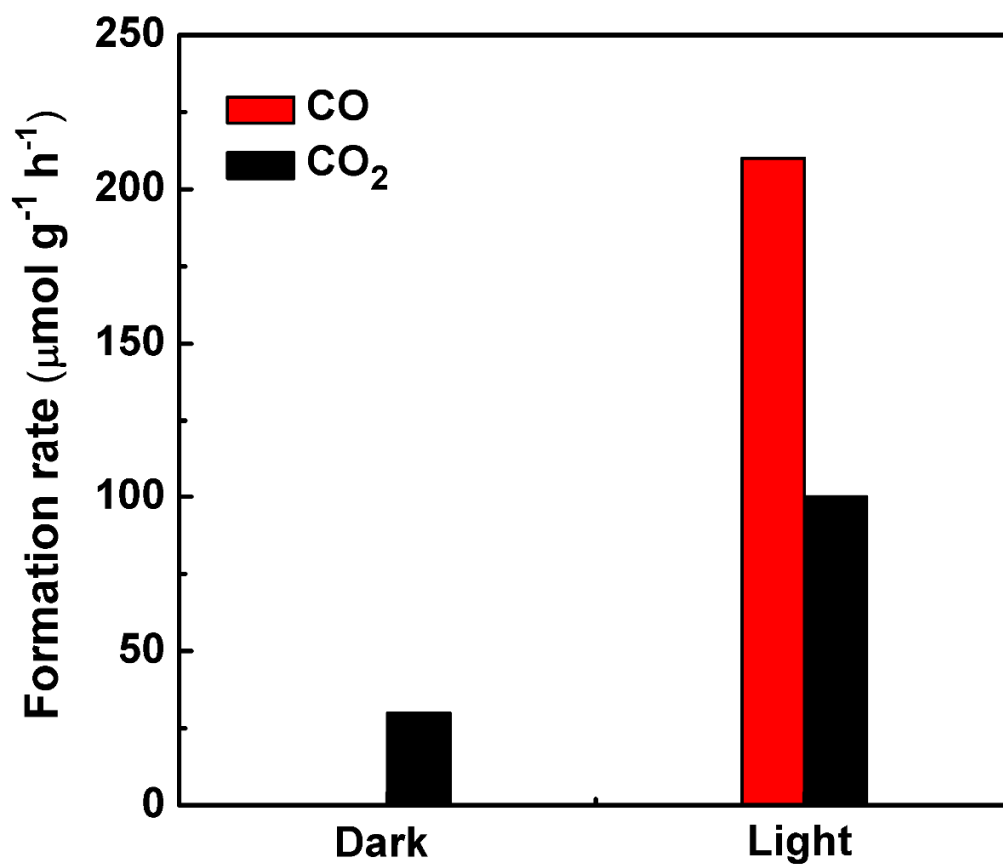

**Supplementary Figure 9.** Rates of production of CO and CO<sub>2</sub> during decomposition of DMC over the Zn-HPW/TiO<sub>2</sub> catalyst. Reaction condition: Catalyst 0.1 g, Ar 0.2 MPa; DMC 2 mL; 6 h in dark or under light.

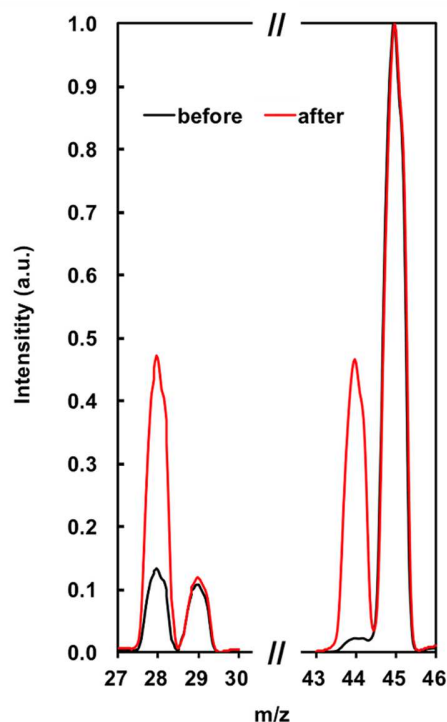

**Supplementary Figure 10.** Mass spectrum in isotopic  $^{13}\text{CO}_2$  labeling experiments (normalized); black = before and red = after photocatalytic reaction.

**Supplementary Figure 10** presents mass spectrum recorded before and after photocatalytic reaction. The experiments were conducted under a  $^{12}\text{CH}_4$ ,  $\text{O}_2$  and  $^{13}\text{CO}_2$  atmosphere (0.3 MPa of  $\text{CH}_4$ , 0.1 MPa of  $\text{O}_2$  and 1% isotopic  $^{13}\text{CO}_2$ ).

To facilitate reading, signals have been normalized to the maximum intensity of peak  $m/z=45$ .

Before reaction (black curve),  $m/z=45$  corresponding to  $^{13}\text{CO}_2$  is clearly visible together with signal at  $m/z=29$  corresponding to  $^{13}\text{CO}_2$  cracking to  $^{13}\text{CO}^+$  fragments in the mass spectrometer ion source. Peaks at  $m/z=28$  represents residual  $\text{N}_2$  in the mass spectrometer vacuum chamber or  $\text{CO}$  species generated by the ion source.  $m/z=44$  represents residual  $\text{CO}_2$  in the vacuum chamber and  $^{12}\text{CO}_2$  impurity contained in the  $^{13}\text{CO}_2$  cylinder. After reaction (red curve),  $m/z=28$  and  $m/z=44$  signals increase due to the production of  $^{12}\text{CO}$  and  $^{12}\text{CO}_2$  from the photocatalytic oxidation of methane.  $m/z=29$  signal increases due to the production of  $^{13}\text{CO}$ . Isotope labelling therefore suggests that some of added  $^{13}\text{CO}_2$  is converted to  $^{13}\text{CO}$ .

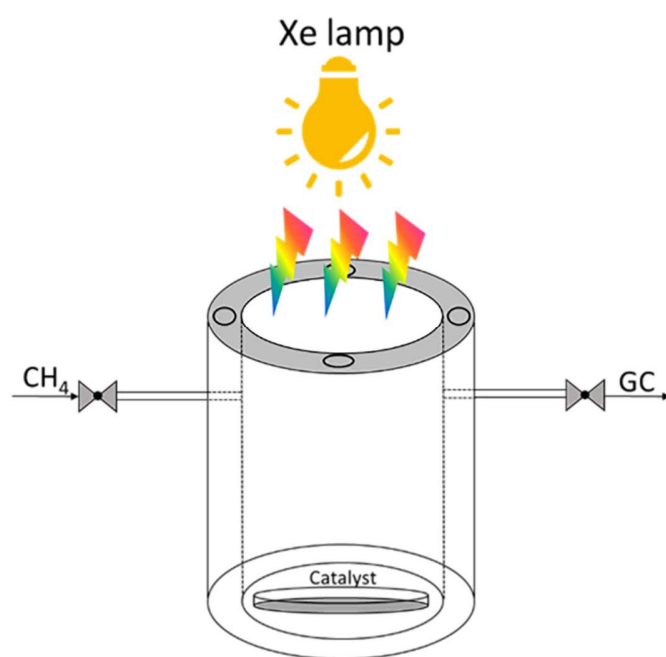

**Supplementary Figure 11.** Schema of photocatalytic reactor.
